# Supplementary material
Source: publisher figshare collection journal article supplement (https://gsapubs.figshare.com/ndownloader/files/28309983)
Supplement: Supplementary file 1 [file 28309983]

## Sheet: Blad1
Holm-Alwmark, S., 2021, Impact cratering record of Sweden—A review, in Reimold, W.U.,
and Koeberl, C., eds., Large Meteorite Impacts and Planetary Evolution VI:
Geological Society of America Special Paper 550, https://doi.org/10.1130/2021.2550(01).
TABLE S2. COMPOSITION OF IMPACTITES FROM MIEN AND THE TARGET ROCKS FROM SELECTED AUTHORS
Sample*	A1 (impact melt rock)	A2 (impact melt rock)	A3 (impact melt rock)	A3 (impact melt rock)	B (impact melt rock)	C1 (suevitic impact breccia)	Impact melt rock, fragment free (his Mi4)	Impact melt rock (his Mi4)	Impact melt rock, fragment free (his Mi7)	Impact melt rock (his Mi7)		1	2	3	4	5	6	7	8
Reference	Stanfors (1973)	Stanfors (1973)	Stanfors (1973)	Stanfors (1973)	Stanfors (1973)	Stanfors (1973)	Mäerz (1979)	Mäerz (1979)	Mäerz (1979)	Mäerz (1979)	Schmidt et al. (1997)	Stanfors (1973)	Stanfors (1973)	Stanfors (1973)	Stanfors (1973)	Stanfors (1973)	Stanfors (1973)	Stanfors (1973)	Stanfors (1973)
wt.%
SiO2	70.5	71	73.5	72.5	70	69	68.6	68.8	75.7	71.8	70.92	72.1	68.2	66.9	71.4	67.26	72.32	72.08	67.09
TiO2	0.4	0.35	0.48	0.38	0.47	0.47	0.2	0.2	0.2	0.2	0.34	0.42	0.67	1.01	0.52	0.48	0.37	0.33	0.81
Al2O3	14.2	13.5	13.2	13	14	13.2	15.8	16.4	15.8	15.6	14.07	14.1	14.7	14.6	14.5	16.11	13.86	14.09	14.15
Fe2O3†	2.7	2.35	2.65	3.2	0.9	2.1	-	-	-	-	2.9	1.38	2.34	2.16	1.43	3.78	0.99	0.9	1.47
FeO	-	-	-	-	-	-	3.7	3.9	2.5	2.6	-	1.2	2.49	2.93	1.28	0.43	1.68	1.57	3.4
MnO	0.06	0.04	0.05	0.03	0.01	0.03	0.05	0.05	0.02	0.07	0.02	0.18	0.18	0.2	0.14	0.09	0.08	0.07	0.1
MgO	0.95	0.86	0.73	0.75	0.26	0.76	2.1	1.4	0.3	0.3	0.46	0.6	0.8	1.1	0.6	0.74	0.58	0.56	1.67
CaO	1.7	1.85	2.4	2	0.7	1.34	2.2	2.1	1.9	1.5	1.98	1.6	2.8	2.9	2	3.04	1.69	1.59	3.57
Na2O	2.95	2.75	3.1	3.2	2.25	2.25	2.5	3	2.5	2.9	3.15	3.1	3.2	2.7	3.2	3.93	3.19	3.16	3.17
K2O	4.5	4.5	3.9	4.5	9.8	6	4.4	4.6	4.6	5.4	4.31	5.1	4.5	5.1	4.5	3.55	5.12	5.04	4
H2O	3.31	2.85	0.83	1.23	1.4	4.53	-	-	-	-	-	0.36	0.28	0.6	0.55	0.72	0.55	0.59	0.42
P2O5	-	-	-	-	-	-	-	-	-	-	0.1	0.1	0.58	0.58	0.03	-	-	-	-
total	101.27	100.05	100.84	100.79	99.79	99.68	99.6	100.5	103.5	100.4	100.19	-	-	-	-	-	-	-	-
LOI	-	-	-	-	-	-	-	-	-	-	1.74	-	-	-	-	-	-	-	-
μg/g
Sc	-	-	-	-	-	-	-	-	-	-	16	-	-	-	-	-	-	-	-
Cr	-	-	-	-	-	-	-	-	-	-	4	-	-	-	-	-	-	-	-
Co	-	-	-	-	-	-	-	-	-	-	175	-	-	-	-	-	-	-	-
Ni	-	-	-	-	-	-	-	-	-	-	34	-	-	-	-	-	-	-	-
Cu	-	-	-	-	-	-	-	-	-	-	37	-	-	-	-	-	-	-	-
Zn	-	-	-	-	-	-	-	-	-	-	20	-	-	-	-	-	-	-	-
Ga	-	-	-	-	-	-	-	-	-	-	343	-	-	-	-	-	-	-	-
Rb	-	-	-	-	-	-	-	-	-	-	169	-	-	-	-	-	-	-	-
Sr	-	-	-	-	-	-	-	-	-	-	54	-	-	-	-	-	-	-	-
Y	-	-	-	-	-	-	-	-	-	-	32	-	-	-	-	-	-	-	-
Zr	-	-	-	-	-	-	-	-	-	-	41	-	-	-	-	-	-	-	-
Ba	-	-	-	-	-	-	-	-	-	-	811	-	-	-	-	-	-	-	-
Hf	-	-	-	-	-	-	-	-	-	-	<4	-	-	-	-	-	-	-	-
ng/g
Os	-	-	-	-	-	-	-	-	-	-	0.06 ± 0.03	-	-	-	-	-	-	-	-
Re (pg/g)	-	-	-	-	-	-	-	-	-	-	70 ± 10	-	-	-	-	-	-	-	-
Ru	-	-	-	-	-	-	-	-	-	-	1.60 ± 0.26	-	-	-	-	-	-	-	-
Rh	-	-	-	-	-	-	-	-	-	-	0.65 ± 0.22	-	-	-	-	-	-	-	-
Pd	-	-	-	-	-	-	-	-	-	-	2.93 ± 0.86	-	-	-	-	-	-	-	-
Ir	-	-	-	-	-	-	-	-	-	-	0.37 ± 0.23	-	-	-	-	-	-	-	-
Pt	-	-	-	-	-	-	-	-	-	-	-	-	-	-	-	-	-	-	-
Au	-	-	-	-	-	-	-	-	-	-	0.62 ± 0.35	-	-	-	-	-	-	-	-
For methods and errors, see original publications.
*For Stanfors (1973) sample types see Table 2. Numbers 1-8 are analyzes of the following (potential) target lithologies:
1. Avg. of 3 analyzes of so-called Spinkamåla granite
2. Avg. of 9 analyzes of so-called Karlshamn granite
3. Avg. of 7 analyzes of so-called Gneiss granite
4. Avg. of 9 analyzes av so-called Coastal gneiss
5. Gray supracrustal gneiss from western lake Lunksjön
6. Spinkamåla granite from roadcut ~2 km southeast of Mien
7. Karlshamn granite from ~2 km southeast of Mien
8. Gray basic gneiss from roadcut ~2.5 km southeast of Mien
†Total Fe expressed as Fe2O3
